# Supplementary material for: Development of a Decision Support Tool for Anticoagulation in Critically Ill Patients Admitted for SARS-CoV-2 Infection: The CALT Protocol
Source: MDPI journal article supplement (doi:10.3390/biomedicines11061504), 2023-05-23
Supplement: s1 [file s1]

**Table S1. Counts of Missing Data**

| Data                                              | Missing data |
|---------------------------------------------------|--------------|
| <b>Weight</b>                                     | 3/124        |
| <b>Height</b>                                     | 7/124        |
| <b>BMI</b>                                        | 8/124        |
| <b>Diabetes</b>                                   | 0/124        |
| <b>Chronic Respiratory Failure</b>                | 0/124        |
| <b>COPD</b>                                       | 0/124        |
| <b>Chronic heart failure</b>                      | 0/124        |
| <b>Cirrhosis</b>                                  | 0/124        |
| <b>End Stage Kidney Disease</b>                   | 0/124        |
| <b>Immunocompromised</b>                          | 0/124        |
| <b>SAPS II</b>                                    | 1/124        |
| <b>SOFA</b>                                       | 1/124        |
| <b>Antiplatelet drug prior to hospitalisation</b> | 24/124       |
| <b>Predominant finding on CT</b>                  | 26/124       |
| <b>Extension of lung injury on CT</b>             | 19/124       |
| <b>Viral Variant</b>                              | 21/124       |
| <b>Vaccinal status</b>                            | 4/124        |
| <b>HFNO</b>                                       | 0/124        |
| <b>CPAP</b>                                       | 0/124        |
| <b>NVI</b>                                        | 0/124        |
| <b>IV</b>                                         | 0/124        |
| <b>ECMO</b>                                       | 0/124        |
| <b>Prone Positioning</b>                          | 24/124       |
| <b>Antibiotherapy</b>                             | 0/124        |
| <b>Biomarkers D1</b>                              |              |
| <i>CRP</i>                                        | 1/124        |
| <i>Leukocytes</i>                                 | 0/124        |
| <i>Lymphocytes</i>                                | 26/124       |
| <i>Platelets</i>                                  | 27/124       |
| <i>Fibrinogen</i>                                 | 8/124        |
| <i>D-Dimers</i>                                   | 21/124       |
| <i>Ferritin</i>                                   | 24/124       |
| <i>LDH</i>                                        | 48/124       |
| <i>PCT</i>                                        | 24/124       |
| <i>Endocan</i>                                    | 0/124        |
| <b>Biomarkers D3</b>                              |              |
| <i>CRP</i>                                        | 23/124       |
| <i>Leukocytes</i>                                 | 17/124       |
| <i>Lymphocytes</i>                                | 60/124       |
| <i>Platelets</i>                                  | 32/124       |
| <i>Fibrinogen</i>                                 | 37/124       |
| <i>D-Dimers</i>                                   | 43/124       |
| <i>Ferritin</i>                                   | 50/124       |
| <i>LDH</i>                                        | 65/124       |
| <i>PCT</i>                                        | 45/124       |
| <i>Endocan</i>                                    | 64/124       |
| <b>Corticosteroids</b>                            | 0/124        |
| <b>Tocilizumab</b>                                | 0/124        |
| <b>Remdesivir</b>                                 | 1/124        |
| <b>Duration of IV</b>                             | 4/124        |
| <b>Duration of antibiotherapy</b>                 | 1/124        |
| <b>ICU length of stay</b>                         | 1/124        |
| <b>Mortality at ICU discharge</b>                 | 0/124        |
| <b>Mortality at D28</b>                           | 0/124        |

Results are presented as number (%). BMI: Body Mass Index, COPD: Chronic Obstructive Pulmonary Disease, CPAP: Continuous Positive Airway Pressure, CRP: C-reactive protein, ECMO: Extra Corporeal Membrane Oxygenation, IV: Invasive Ventilation, LDH: Lactate dehydrogenase, NIV: Non-invasive Ventilation, PCT: Procalcitonin.
