# Supplementary material for: Development of a Decision Support Tool for Anticoagulation in Critically Ill Patients Admitted for SARS-CoV-2 Infection: The CALT Protocol
Source: MDPI journal article supplement (doi:10.3390/biomedicines11061504), 2023-05-23
Supplement: s1 [file s1]

**Table S2. Intrinsic performance and predictive values of the CALT 1 score**

| Value of CALT 1 | Se   | Sp   | PPV  | NPV  |
|-----------------|------|------|------|------|
| ≥ 1             | 0.96 | 0.45 | 0.28 | 0.98 |
| ≥ 2             | 0.83 | 0.69 | 0.37 | 0.95 |
| ≥ 3             | 0.79 | 0.72 | 0.39 | 0.94 |
| ≥ 4             | 0.5  | 0.96 | 0.74 | 0.9  |
| ≥ 5             | 0.33 | 0.96 | 0.65 | 0.87 |

Se: Sensibility, Sp: Specificity, PPV: Positive Predictive Value, NPV: Negative Predictive Value.
