# Supplementary material for: Development of a Decision Support Tool for Anticoagulation in Critically Ill Patients Admitted for SARS-CoV-2 Infection: The CALT Protocol
Source: MDPI journal article supplement (doi:10.3390/biomedicines11061504), 2023-05-23
Supplement: s1 [file s1]

**Table S3. Intrinsic performance and predictive values of the CALT 2 score**

| Value of CALT 2 | Se   | Sp   | VPP  | VPN  |
|-----------------|------|------|------|------|
| ≥ 0             | 0.94 | 0.58 | 0.44 | 0.97 |
| ≥ 1             | 0.85 | 0.68 | 0.48 | 0.93 |
| ≥ 2             | 0.79 | 0.73 | 0.51 | 0.91 |
| ≥ 3             | 0.59 | 0.92 | 0.72 | 0.87 |
| ≥ 4             | 0.23 | 0.98 | 0.79 | 0.79 |
| ≥ 5             | 0.12 | 0.99 | 0.79 | 0.76 |
| ≥ 6             | 0.03 | 1    | 1    | 0.75 |

Se: Sensibility, Sp: Specificity, PPV: Positive Predictive Value, NPV: Negative Predictive Value.
